# Supplementary material for: MycoRed: Betalain pigments enable in vivo real-time visualisation of arbuscular mycorrhizal colonisation
Source: PubMed Central journal article supplement (PMC8312983; doi:10.1371/journal.pbio.3001326), 2021-07-14

**S1 Fig.** Expression of arbuscular mycorrhiza symbiosis marker genes *MtSTR* and *MtRAM2* in *Medicago truncatula* *MtPT4*-p1 composite roots is induced after inoculation with *Rhizophagus irregularis* and shows evidence of functional symbiosis. Expression of *Rhizophagus irregularis*  $\beta$ -tubulin (*RiBTub*) and elongation factor 1-alpha (*RiEF*) is used as a fungal biomass marker for root colonisation. Gene expression was analysed by qRT-PCR 4 weeks post inoculation. Mock roots were inoculated with autoclaved *R. irregularis* inoculum. Error bars represent standard errors of three biological replicates. Statistical p-value ( $p$ ) was obtained via unpaired two-samples Student's  $t$  test. Data underlying this figure can be found in S3 Data.

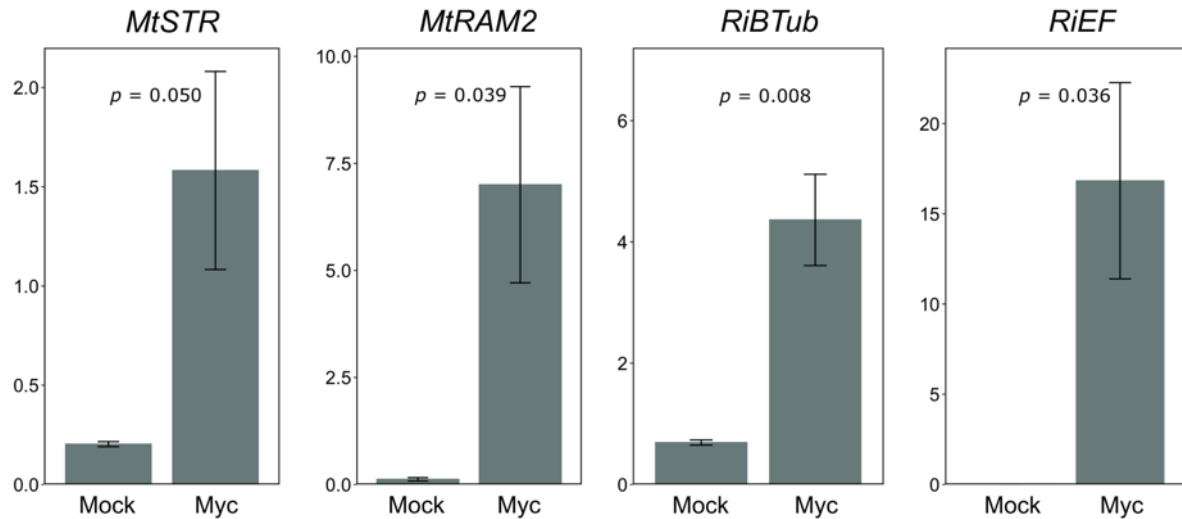

Supplement: pbio.3001326.s001.pdf [file pbio.3001326.s001.pdf]
