# Supplementary material for: MycoRed: Betalain pigments enable in vivo real-time visualisation of arbuscular mycorrhizal colonisation
Source: PubMed Central journal article supplement (PMC8312983; doi:10.1371/journal.pbio.3001326), 2021-07-14

**S2 Fig.** GUS staining of *Medicago truncatula* roots expressing *MtPT4::GUS* (a,b) and *MtBCP1::GUS* (c,d). GUS staining confirms promoter expression is limited to single cells in typically arbusculated tissue layers (inner cortex). Scale bar, 100  $\mu$ m.

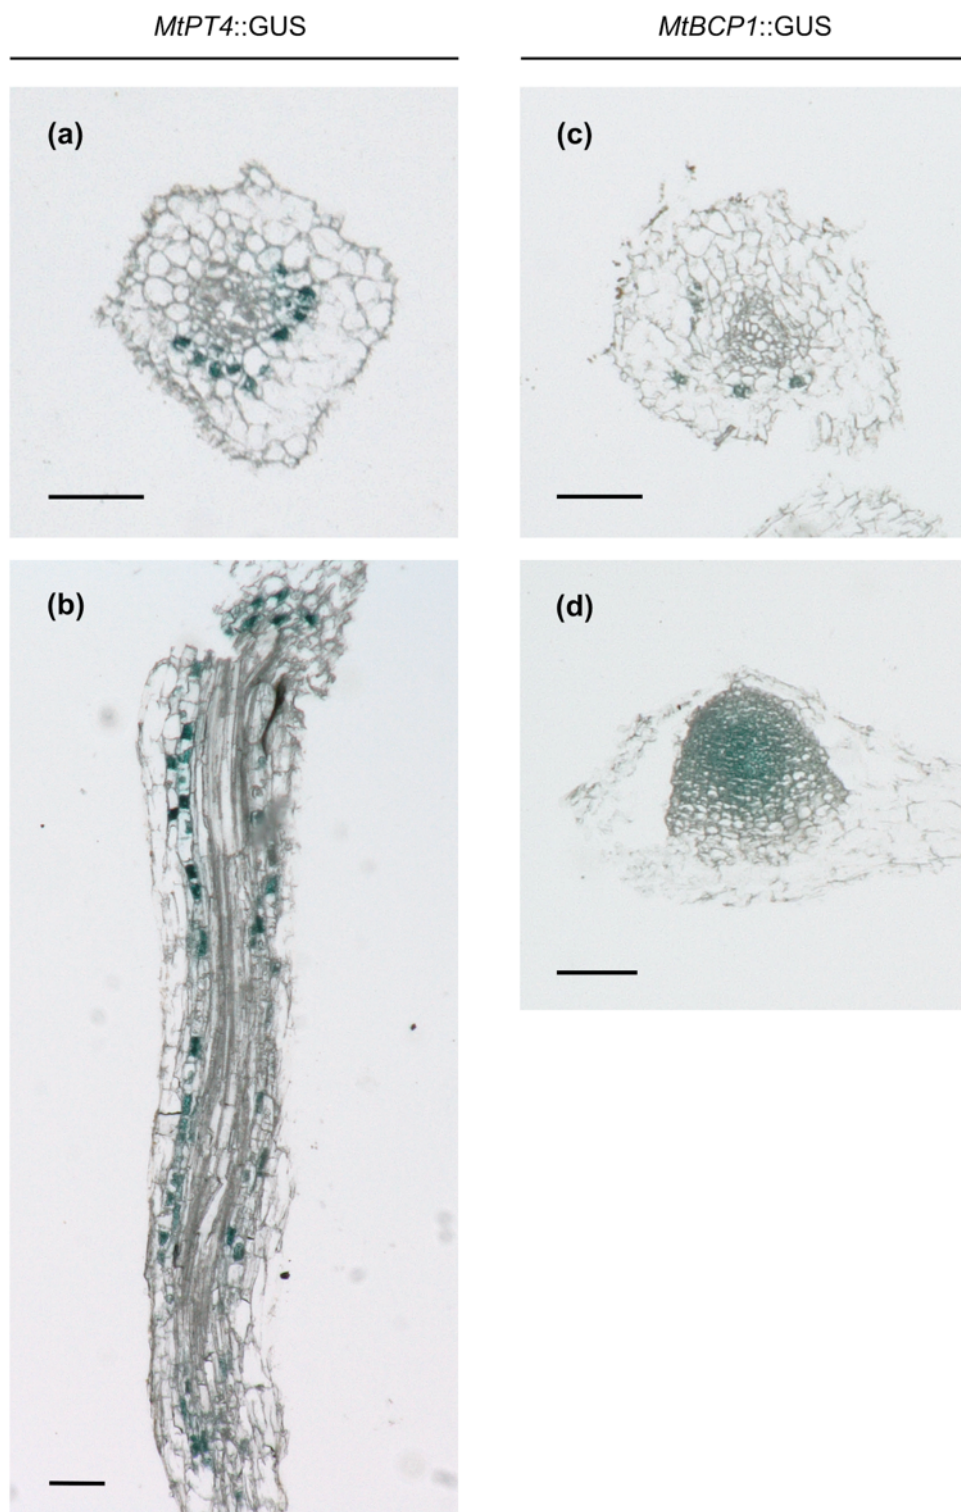

Supplement: pbio.3001326.s002.pdf [file pbio.3001326.s002.pdf]
