# Supplementary material for: MycoRed: Betalain pigments enable in vivo real-time visualisation of arbuscular mycorrhizal colonisation
Source: PubMed Central journal article supplement (PMC8312983; doi:10.1371/journal.pbio.3001326), 2021-07-14

**S3 Fig.** Phylogenetic analysis of the PT and BCP1 orthogroups containing the a) *MtPT4* and *NbPT5b* homologs and b) *MtBCP1* and *NbBCP1b* homologs respectively.

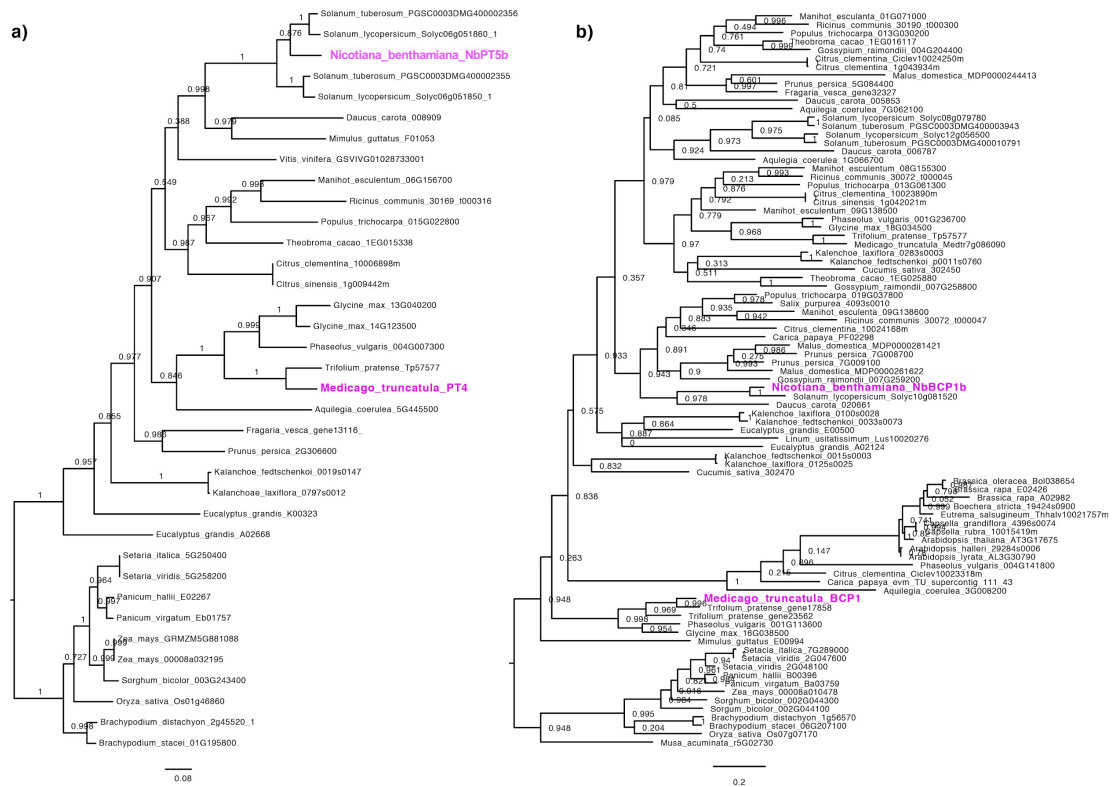

Supplement: pbio.3001326.s003.pdf [file pbio.3001326.s003.pdf]
