# Supplementary material for: MycoRed: Betalain pigments enable in vivo real-time visualisation of arbuscular mycorrhizal colonisation
Source: PubMed Central journal article supplement (PMC8312983; doi:10.1371/journal.pbio.3001326), 2021-07-14

**S4 Fig.** 6-week old *Nicotiana benthamiana* T1 plants from *NbPT5b*-p1 (a-d) and *NbBCP1*-p1 (e-h) expressing lines. (a,b,e,f) Plants 4-week after inoculation with *Rhizophagus irregularis*, (c,d,g,h) Plants descending from same lines mock inoculated with autoclaved *R. irregularis* inoculum. Scale bar, 1 cm.

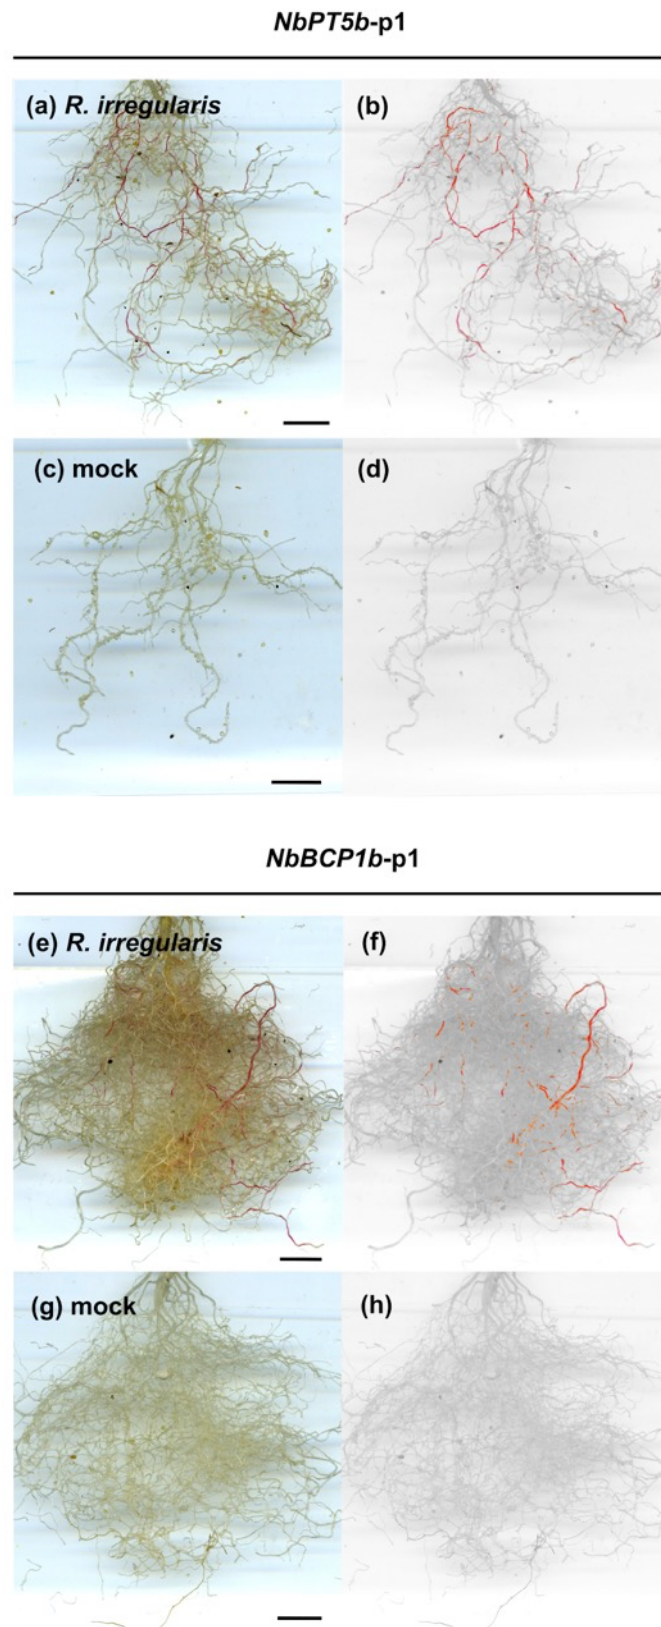

Supplement: pbio.3001326.s004.pdf [file pbio.3001326.s004.pdf]
