# Supplementary material for: MycoRed: Betalain pigments enable in vivo real-time visualisation of arbuscular mycorrhizal colonisation
Source: PubMed Central journal article supplement (PMC8312983; doi:10.1371/journal.pbio.3001326), 2021-07-14

**S5 Fig.** Ink staining of *Nicotiana benthamiana* roots expressing *NbPT5b-p1* (a-d) and *NbBCP1b-p1* (e-h) after inoculation with *Rhizophagus irregularis*. (a,b,e,f) Root fragments that displayed betalain colouration before ink staining are represented by a red '+' sign. (c,d,g,h) Root fragments that displayed no colouration before ink staining are represented by a grey '-' sign. (b,d,f,h) are amplified images of the area delimited by the dashed squares. Scale bar, 1 mm.

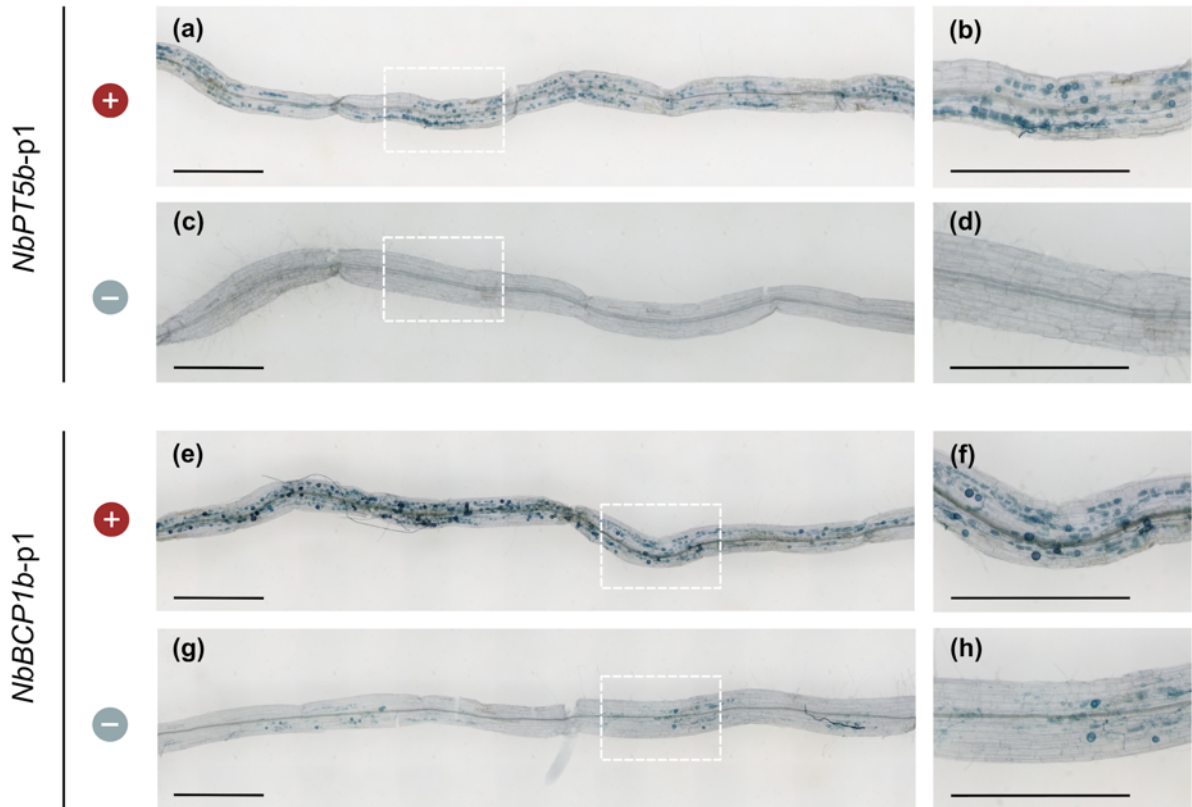

Supplement: pbio.3001326.s005.pdf [file pbio.3001326.s005.pdf]
