# Supplementary material for: MycoRed: Betalain pigments enable in vivo real-time visualisation of arbuscular mycorrhizal colonisation
Source: PubMed Central journal article supplement (PMC8312983; doi:10.1371/journal.pbio.3001326), 2021-07-14

**S7 Fig.** One-week old *Nicotiana benthamiana* T1 seedlings from *NbPT5b-p1* and *NbBCP1b-p1* expressing lines. *NbPT5b-p1* lines developed shorter roots and smaller leaves, which also appeared lightly pigmented in some cases. *NbPT5b-p1* lines 18, 19 and 23, and the *NbBCP1b-p1* line 32, were able to produce pigments upon colonisation with *R. irregularis*. *NbPT5b-p1* line 23 didn't produce any pigments upon colonisation.

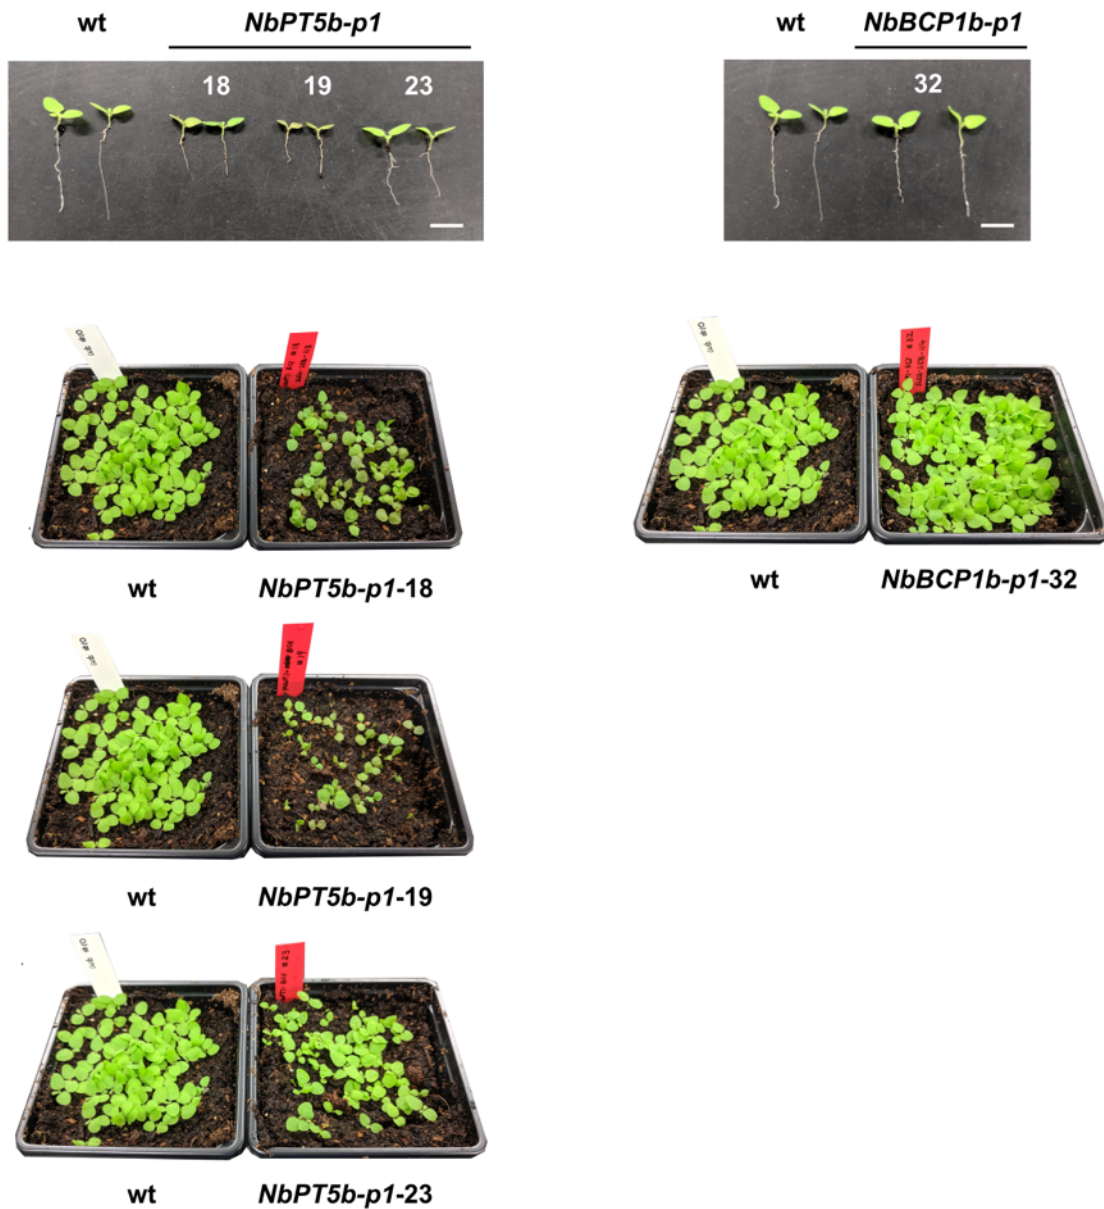

Supplement: pbio.3001326.s007.pdf [file pbio.3001326.s007.pdf]
