# Supplementary material for: MycoRed: Betalain pigments enable in vivo real-time visualisation of arbuscular mycorrhizal colonisation
Source: PubMed Central journal article supplement (PMC8312983; doi:10.1371/journal.pbio.3001326), 2021-07-14

**S9 Fig.** Root systems of *NbPT5b*-p3 (a-d) and *NbBCP1b*-p3 (e-h) *Nicotiana benthamiana* plants colonised by *Rhizophagus irregularis*. Images were taken at 52 dpi. (a,b,e,f) Plants inoculated with *R. irregularis*. (c,d,g,h) Plants descending from the same lines mock inoculated with autoclaved inoculum. (a,c,e,g) are reflective light images, (b,d,f,h) are filtered for red coloring only. Scale bar, 1.3 cm.

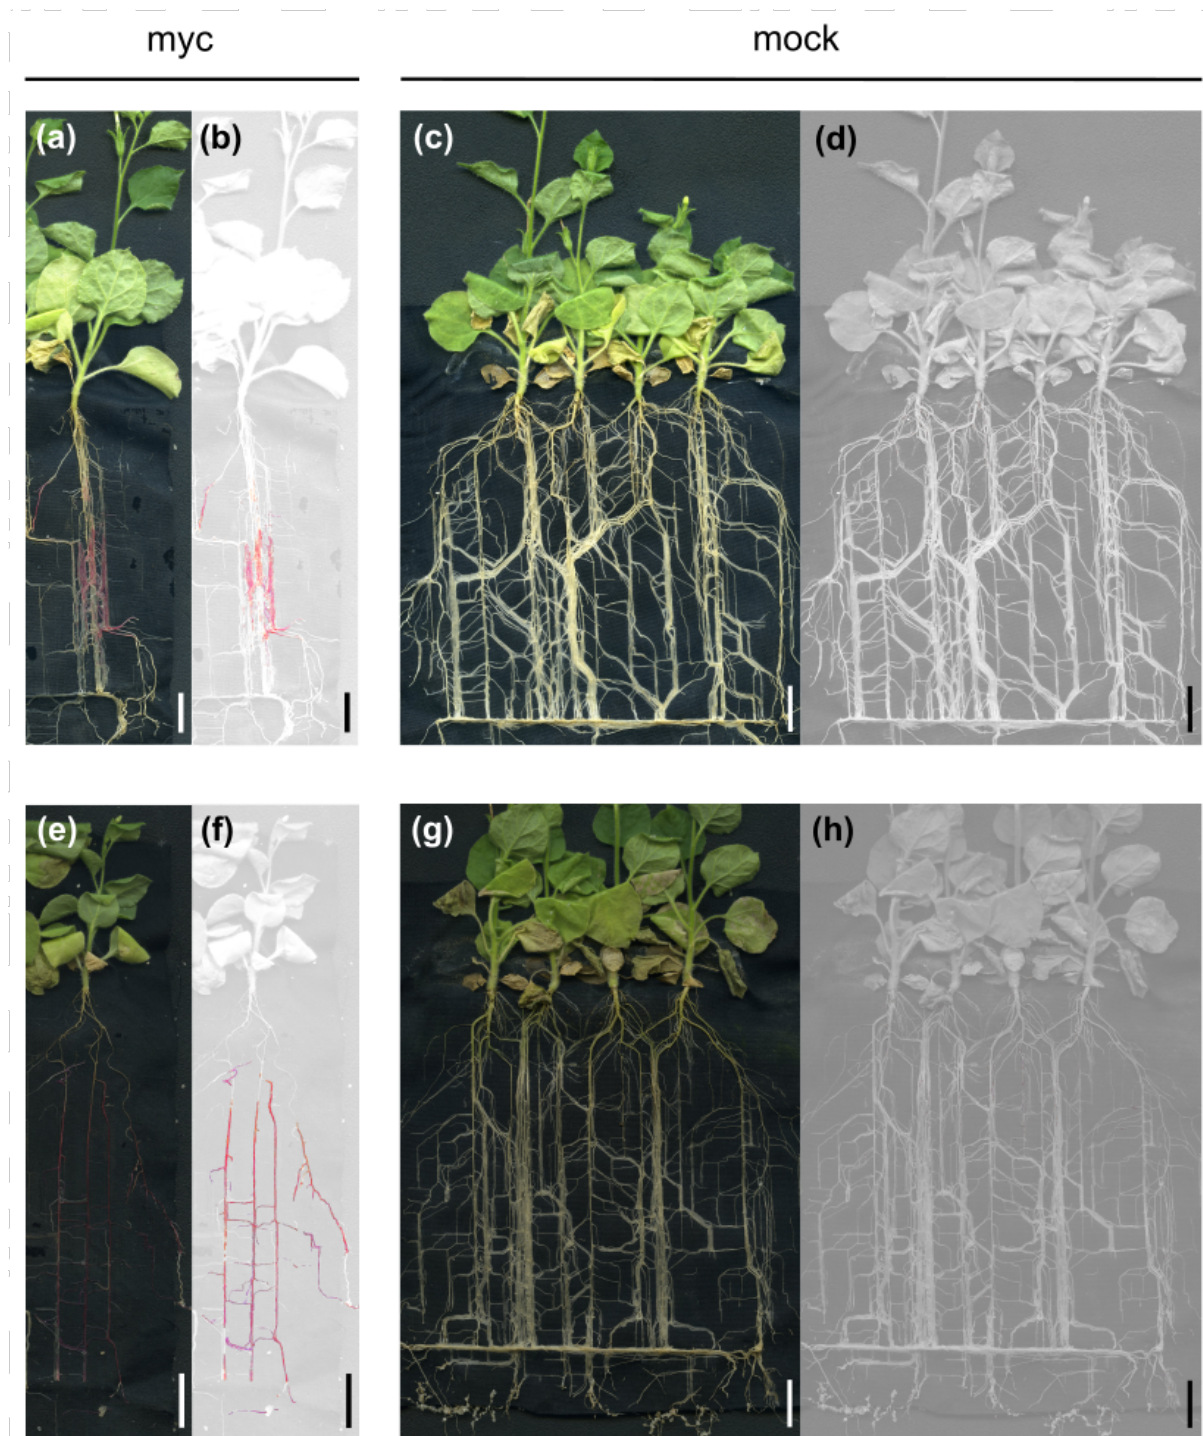

Supplement: pbio.3001326.s009.pdf [file pbio.3001326.s009.pdf]
