# Supplementary material for: MycoRed: Betalain pigments enable in vivo real-time visualisation of arbuscular mycorrhizal colonisation
Source: PubMed Central journal article supplement (PMC8312983; doi:10.1371/journal.pbio.3001326), 2021-07-14

**S10 Fig.** Quantification of root AM colonisation shows no differences between *Nicotiana benthamiana* WT and reporter lines. *N. benthamiana* plants were inoculated with *Rhizophagus irregularis*, and ink stained 4 weeks after inoculation (wpi). (a) Colonisation extent in *N. benthamiana* WT versus lines expressing *NbBCP1b-p3* (BCP1-19 and BCP1-24) and *NbPT5b-p3* (PT5b-16 and PT5b-21). Colonisation extent is calculated as the percentage of root containing arbuscules, vesicles or internal hyphae over the total root system. (b) Frequency of arbuscules and vesicles recorded in colonised roots of *N. benthamiana* WT versus lines expressing *NbBCP1b-p3* and *NbPT5b-p3*. Frequency is calculated as the percentage of root containing arbuscules or vesicles over the extent of root colonised by *R. irregularis*. Individual points represent individual plants. Error bars represent standard errors. Data underlying this figure can be found in S3 Data.

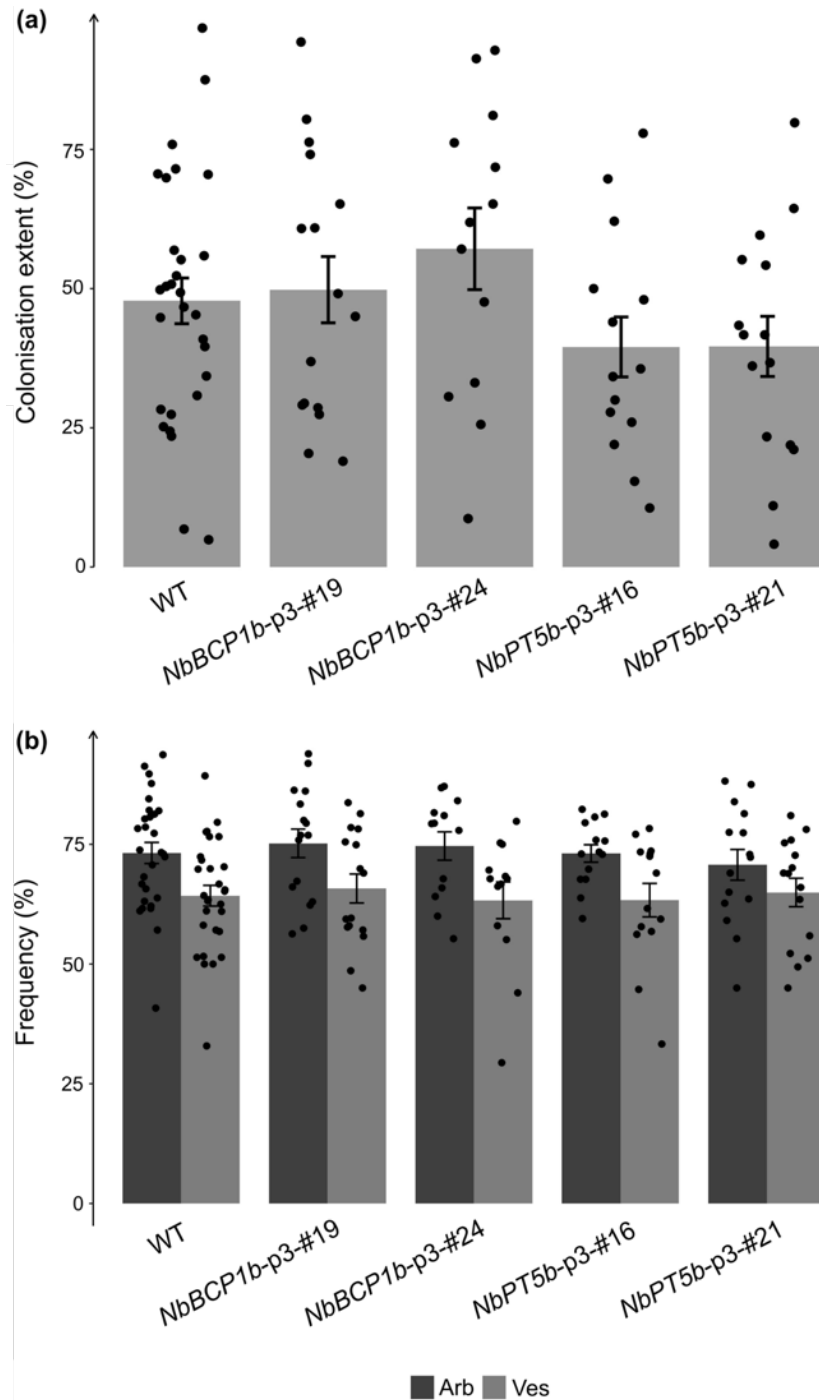

Supplement: pbio.3001326.s010.pdf [file pbio.3001326.s010.pdf]
