# Supplementary material for: MycoRed: Betalain pigments enable in vivo real-time visualisation of arbuscular mycorrhizal colonisation
Source: PubMed Central journal article supplement (PMC8312983; doi:10.1371/journal.pbio.3001326), 2021-07-14

**S12 Fig.** Betacyanin production in *Medicago truncatula* roots as a response to AM fungi colonisation via expression of the entire betalain pathway under an AM symbiosis specific promoter. (a) Schematic of the multi-gene vector constructed for inducible betalain expression in *M. truncatula* roots with the three betalain biosynthetic genes controlled by the *MtPT4* promoter. (b-e) Expression of *MtPT4*-p3 in roots 4 weeks after inoculation with *Rhizophagus irregularis* led to pigment accumulation in roots. (f-i) Mock inoculated roots expressing *MtPT4*-p3 didn't show any pigment production. (b,f) Images taken under reflective light, (c,g) are filtered for red colouring only. (d,h) Close up root images in bright field, (e,i) and filtered to observe DSRed fluorescence. (j) Root section of *M. truncatula* expressing *MtPT4*-p3. Betalain accumulation correlates with arbuscule formation but can be observed mainly in the endodermal layer adjacent to arbuscule-containing cortical cells, pericycle and stele. Open arrows mark internal hyphae and filled arrows signal cells containing arbuscules. Scale bar (b,f), 1 cm; scale bar (e,i), 1.5 mm; scale bar (j), 150  $\mu$ m.

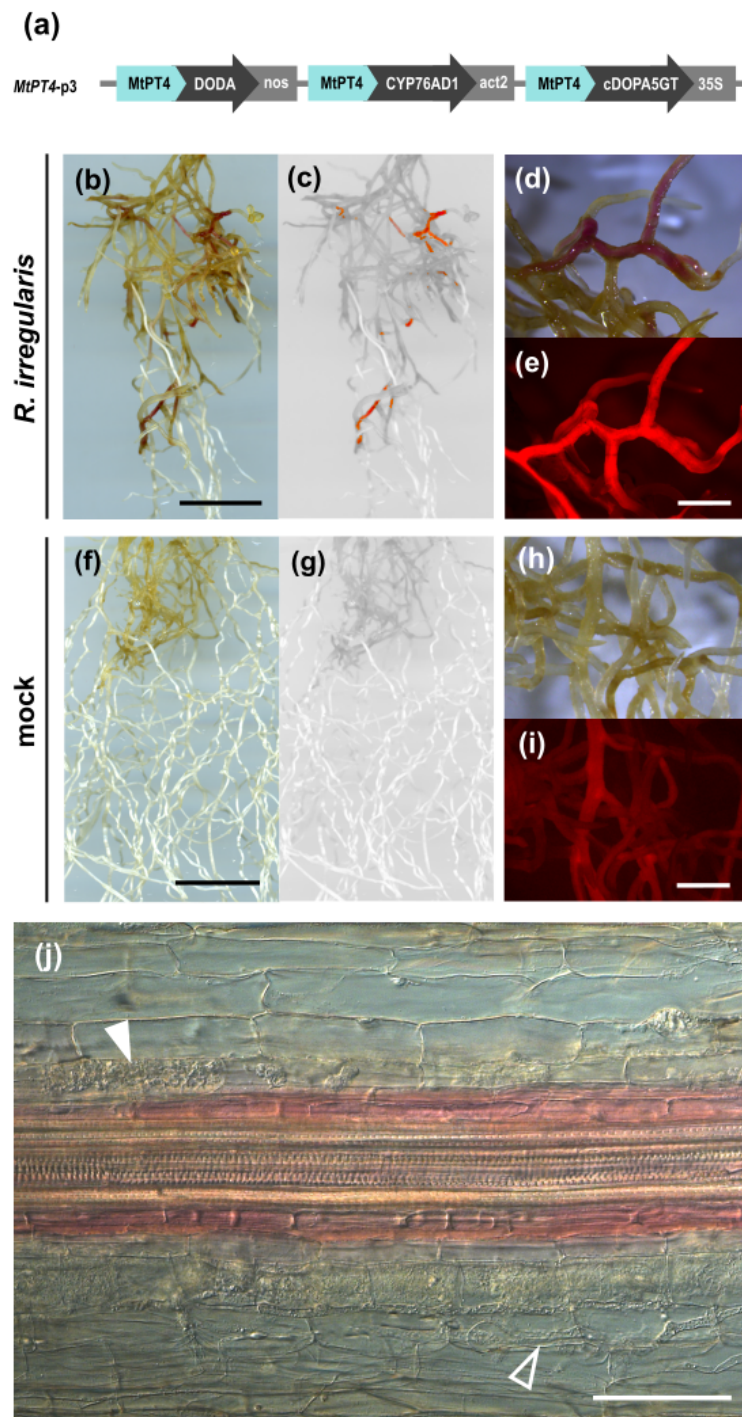

Supplement: pbio.3001326.s012.pdf [file pbio.3001326.s012.pdf]
