# Supplementary material for: MycoRed: Betalain pigments enable in vivo real-time visualisation of arbuscular mycorrhizal colonisation
Source: PubMed Central journal article supplement (PMC8312983; doi:10.1371/journal.pbio.3001326), 2021-07-14

**S15 Fig.** *NbPT5b* promoter-controlled betalain biosynthesis allows for dynamic tracing of root colonisation processes in *Nicotiana benthamiana*. Transgenic *NbPT5b*-p3 plants grown in a rhizotron setup supplied with *Rhizophagus irregularis* spore inoculum imaged over time. (a) Reflective light images, (b) represent the same images filtered for red/magenta hues. dpi, days post inoculation. Scale bar, 1 cm.

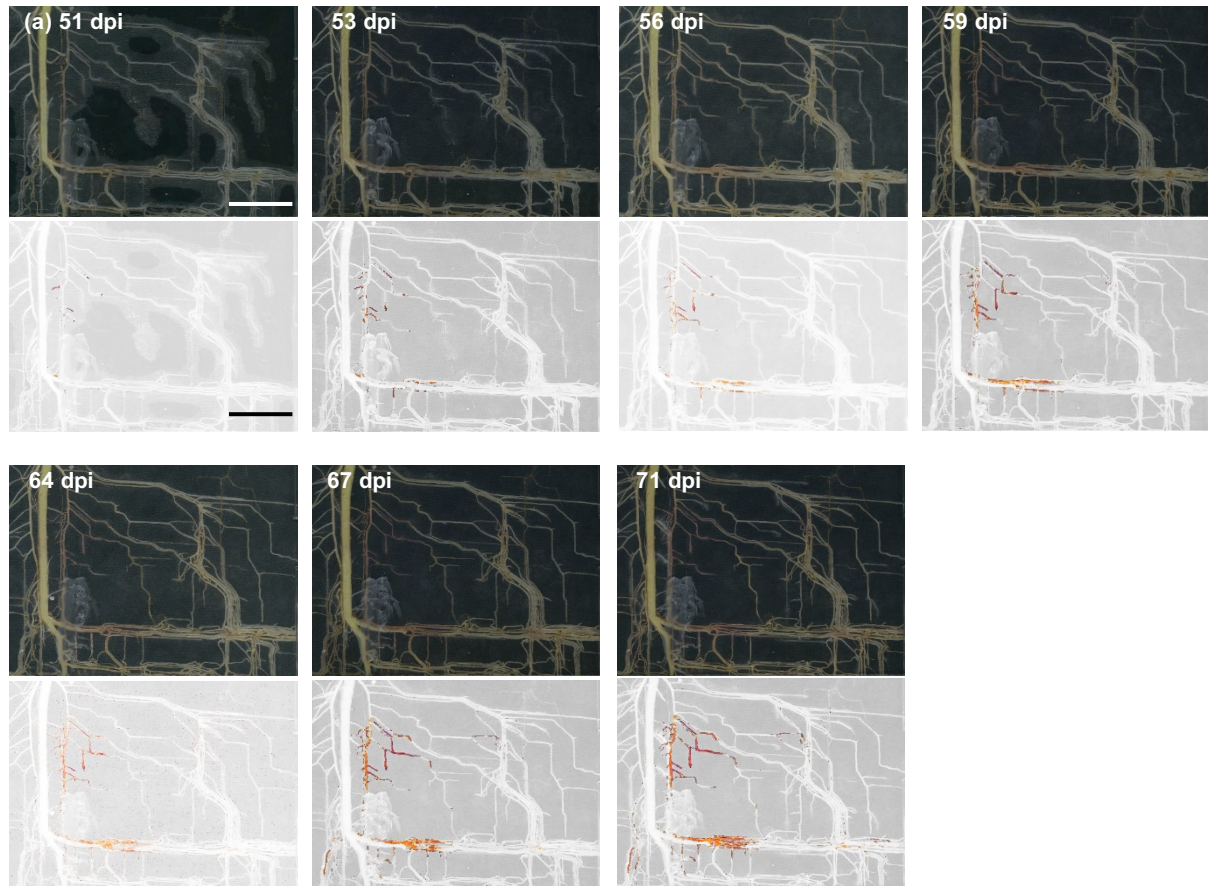

Supplement: pbio.3001326.s015.pdf [file pbio.3001326.s015.pdf]
