# Supplementary material for: MycoRed: Betalain pigments enable in vivo real-time visualisation of arbuscular mycorrhizal colonisation
Source: PubMed Central journal article supplement (PMC8312983; doi:10.1371/journal.pbio.3001326), 2021-07-14
Supplement: pbio.3001326.s017.pdf [file pbio.3001326.s017.pdf]

**S2 Table.** List of oligonucleotide primers used in this study.

| Primer ID     | Sequence 5'-3'                          | Purpose                                                                   |
|---------------|-----------------------------------------|---------------------------------------------------------------------------|
| MtPT4pro_F    | CTCGATCCACAACAAAGATT                    | Cloning of MtPT4 promoter from gDNA                                       |
| MtPT4pro_R    | CTCAAGTTGGTTTTTGGAGT                    |                                                                           |
| MtBCP1pro_F   | CACATCTAGAGAGAGGGAGATGTGTT              | Cloning of MtBCP1 promoter from gDNA                                      |
| MtBCP1pro_R   | TCTCGGATCCTGCAATTGCAACTGATGAAAG         |                                                                           |
| NbPT5bpro_F   | GTGAGAAATTTACCAAATACCTATAAATAATGTATCAGC | Cloning of NbPT5b promoter from gDNA                                      |
| NbPT5bpro_R   | GTTTGCTTTTTACTGCAAAATTTGGTTG            |                                                                           |
| NbBCP1bpro_F  | ACTGGTATTAGAATAATAGCCTGTTTAGCC          | Cloning of NbBCP1b promoter from gDNA                                     |
| NbBCP1bpro_R  | GGAAAATTCTTCTTTAAGGGTTAGTTG             |                                                                           |
| NbPT5b_qF     | TTACTACGATCCTGCTACACACG                 | qRT-PCR for gene validation                                               |
| NbPT5b_qR     | CAGTTAAAGTACCAACCAAAGCC                 |                                                                           |
| NbBCP1b_qF    | TCGAAGATGGAGTTCGGCA                     | qRT-PCR for gene validation                                               |
| NbBCP1b_qR    | AATCAACATCAATGGTCCAGCC                  |                                                                           |
| RiBTub_qF     | AACAATTGGGCCAAAGGTCACT                  | qRT-PCR for gene validation                                               |
| RiBTub_qR     | CGCTTCTTTGCGAACAACATCT                  |                                                                           |
| RiEF_qF       | TGTTGCTTCGTCCCAATATC                    | qRT-PCR for gene validation                                               |
| RiEF_qR       | GGTTTATCGGTAGGTGCGAG                    |                                                                           |
| NbEF1a_qF     | AGCTTTACCTCCCAAGTCATC                   | qRT-PCR for gene validation and RT-PCR of T1 <i>N. benthamiana</i> plants |
| NbE1Fa_qR     | AGAACGCCTGTCAATCTTGG                    |                                                                           |
| MtSTR_qF      | TTCCAATGATGCAGTCCCA                     | qRT-PCR for gene validation                                               |
| MtSTR_qR      | TGGTTATGACTGCAATGTGAG                   |                                                                           |
| MtRAM2_qF     | GGGGGCTGATATGGTTTTGGGA                  | qRT-PCR for gene validation                                               |
| MtRAM2_qR     | TGTAACCCTCCTTGACAAAAGC                  |                                                                           |
| MtUBQ_qF      | GCAGATAGACACGCTGGGA                     | qRT-PCR for gene validation                                               |
| MtUBQ_qR      | AACTCTTGGGCAGGCAATAA                    |                                                                           |
| BvCYP76AD1_qF | AACTGCAACAACAACGACGA                    | RT-PCR of T1 <i>N. benthamiana</i> plants                                 |
| BvCYP76AD1_qR | AAAATGTGCGACGAGCAAATGG                  |                                                                           |
| BvDODAA1_qF   | TGCTGCTATGTACCAGTTCAAGT                 | RT-PCR of T1 <i>N. benthamiana</i> plants                                 |
| BvDODAA1_qR   | CAGTTCCGCCGTTTCGAAA                     |                                                                           |
| MjcDOPA5GT_qF | CAACATTCATCATCTGATAA                    | RT-PCR of T1 <i>N. benthamiana</i> plants                                 |
| MjcDOPA5GT_qR | GTGATCCAAATGAGATGTAT                    |                                                                           |
| MtPT4_iv0_F   | TGAAGACATGGAGCTCGATCCACAACAAAGATT       | MoClo Golden gate cloning of promoters                                    |
| MtPT4_iv0_R   | TGAAGACATCATTCTCAAGTTGGTTTTTGGAGT       |                                                                           |
| MtBCP1_iv0_F  | TGAAGACATGGAGAATGCGTTGCTTAAGAGTTG       | MoClo Golden gate cloning of promoters                                    |
| MtBCP1_iv0_R  | TGAAGACATCATTGATCAAAATTTGATTTTGG        |                                                                           |

| <b>Primer ID</b> | <b>Sequence 5'-3'</b>                                    | <b>Purpose</b>                            |
|------------------|----------------------------------------------------------|-------------------------------------------|
| NbPT5b_iv0_F     | TGAAGACATGGAGGTGAGAAATTTACCAAATACCTATA<br>AATAATGTATCAGC | MoClo Golden gate<br>cloning of promoters |
| NbPT5b_iv0_R     | TGAAGACATCATTGTTTGCTTTTACTGCAAATTTTGGT<br>TG             |                                           |
| NbBCP1b_iv0_F    | TGAAGACATGGAGACTGGTATTAGAATAATAGCCTGTT<br>TAGCC          | MoClo Golden gate<br>cloning of promoters |
| NbBCP1b_iv0_R    | TGAAGACATCATTGGAAAATTCTTCTTTAAGGGTTAGTT<br>G             |                                           |
