# Supplementary material for: MycoRed: Betalain pigments enable in vivo real-time visualisation of arbuscular mycorrhizal colonisation
Source: PubMed Central journal article supplement (PMC8312983; doi:10.1371/journal.pbio.3001326), 2021-07-14
Supplement: pbio.3001326.s018.pdf [file pbio.3001326.s018.pdf]

**S3 Table.** List of vectors used in this study. Level 0 vectors used for construction of level 2 multigene vectors, which are also listed as MycoRed reporter constructs. All vectors are available to obtain free of charge through Addgene. Plasmid maps and sequence files can be downloaded in the Addgene website with the catalog numbers provided.

#### Level 0 vectors

| Plasmid ID            | Addgene # | Description                                                                                                                                                            |
|-----------------------|-----------|------------------------------------------------------------------------------------------------------------------------------------------------------------------------|
| pL0-MtPT4Pro          | 159414    | <i>Medicago truncatula</i> PT4 promoter sequence (836 bp immediately upstream of start codon) in pICH41295 MoClo Golden Gate level 0 acceptor for Pro+5U modules.      |
| pL0-MtBCP1Pro         | 159415    | <i>Medicago truncatula</i> BCP1 promoter sequence (1108 bp immediately upstream of start codon) in pICH41295 MoClo Golden Gate level 0 acceptor for Pro+5U modules.    |
| pL0-NbPT5bPro         | 159416    | <i>Nicotiana benthamiana</i> PT5b promoter sequence (1068 bp immediately upstream of start codon) in pICH41295 MoClo Golden Gate level 0 acceptor for Pro+5U modules.  |
| pL0-NbBCP1bPro        | 159417    | <i>Nicotiana benthamiana</i> BCP1b promoter sequence (1231 bp immediately upstream of start codon) in pICH41295 MoClo Golden Gate level 0 acceptor for Pro+5U modules. |
| pL0-BvDODA $\alpha$ 1 | 162528    | <i>Beta vulgaris</i> 4,5-DOPA dioxygenase alpha 1 coding sequence in pICH41308 MoClo Golden Gate level 0 acceptor for CDS1 modules.                                    |
| pL0-BvCYP76AD1        | 162529    | <i>Beta vulgaris</i> cytochrome P450 76AD1 coding sequence in pICH41308 MoClo Golden Gate level 0 acceptor for CDS1 modules.                                           |
| pL0-MjcDOPA5GT        | 162530    | <i>Mirabilis jalapa</i> cyclo-DOPA 5-O-glucosyltransferase coding sequence in pICH41308 MoClo Golden Gate level 0 acceptor for CDS1 modules.                           |

#### MycoRed reporter vectors

| Plasmid ID | Addgene # | Description                                                                                                                                                                                                     |
|------------|-----------|-----------------------------------------------------------------------------------------------------------------------------------------------------------------------------------------------------------------|
| NbPT5b-p3  | 160001    | Multigene construct containing the betalain pigment biosynthetic genes under the control of the NbPT5b promoter for visualisation of arbuscular mycorrhizal colonisation in <i>Nicotiana benthamiana</i> roots. |
| NbBCP1b-p3 | 160002    | Multigene construct containing the betalain pigment biosynthetic genes under the control of the NbBCP1b promoter for visualisation of arbuscular mycorrhizal colonisation in <i>Nicotiana benthamiana</i> roots |
| MtPT4-p3   | 160003    | Multigene construct containing the betalain pigment biosynthetic genes under the control of the MtPT4 promoter for visualisation of arbuscular mycorrhizal colonisation in <i>Medicago truncatula</i> roots.    |
