# Supplementary material for: MycoRed: Betalain pigments enable in vivo real-time visualisation of arbuscular mycorrhizal colonisation
Source: PubMed Central journal article supplement (PMC8312983; doi:10.1371/journal.pbio.3001326), 2021-07-14
Supplement: pbio.3001326.s019.pdf [file pbio.3001326.s019.pdf]

**S1 Data.** AM specific promoter sequences used for vector construction. All sequences were selected immediately upstream the start codon of the gene.

>*MtPT4 promoter (836 bp)*

```
CTCGATCCACAACAAAGATTAATTTTTGTTCAAACAACATAACTATCTGAAAATACACTTCCAAAAATATGTAAATTTTTG
TTTTTTTTAACATGGAGTGAAAAAAGTTGCTCCCTTATTATTTAATTGGCACACATTTTTGTATGTTTAGTAAATGACACGC
ATTCTATTCGGTGGTAACGTTTGTCCCTCACATACACCTCATTGAAATGCATTTGTATCCTACTACCTCCCTTCCAATTATA
TAAGATATTTTTGAATTTTTTTGTTCCTTTTTTATAAGACCTCCTTGTTATTTCCAATTAATAATTATTCTTTACATATA
TGTCCCTATTTATTATACATTTTTTTCTTCAATCAGCAATAAATAGCATGTTGAAAATATAAACTATCTCTCTTTCTAAAGGA
TAAATTTGTAATCAATAGTGATACAAATAACTTTAATACAAATACTCACTTTCTTAATTCCTGTGATTTTTGGCAAAAAGG
TCTTGTATATAGGGACGGAGGTAGTATTATGTTAGCAAGCAGCTAAAAACAAAAACAATAATCCTCTTTTTACAGCTAACTGT
AACAAAAACAAAAGCACTTAGCATTTTTGAACATTCCTATAAAGAATATCCTAATTAATTGATCAACACTAGGTGAATATCCA
TAACATTTAGCTAGCAATCTCAATTTTTCTGTTCTCATCTCCTAAGCTAACTTAGGACTAAACGTCACATTGTTACATTATC
AACACATATCAATGCATAGCCATAATAATATATATAAGAGCATACACATAAACACCTAAACCAATTAACCCAAAAACCAA
CTTGAG
```

>*MtBCP1 promoter (1108 bp)*

```
AATGCGTTGCTTAAGAGTTGGTTAATCTATTTGAAATGTTGCGATTATAGTAGATCTTGTGCTCCCATCTTTAATATATCTTT
TACACTTACTCCTTAGTTATACAAACATTAACATCATAACTTCTAAGGTAATTGATACGTGCCAAAATTTCTAAACTCCATT
AAATTTGGTTTGAAGAAATTTTCATGAAATTCCTCTAGTTCGTTATAAATATTAGATAATTAGGTTTTGAGTAGCATTGTAGC
TACCATGACCTATTTCCATTACATTTGTAGGTTTAAAAGATCAAAGATGACTTGGGGTATCAATTAACGAGTGAGCATATATG
CGAGCAAGGAAAGAGATAAGTCAGAGTGTTAAGGAAAGCAAGGCAAGAAAATCACTTAGGGAGCCAAAACAAGGTCAATAC
TCGATTACATCTCTAATTTAAGCTTGAGAAGCTTGATATATTCGAGACTCCTCAAGTATTTGACTCCAAGTGTCAATACTCGA
TTACATCTCTAATTTCCAAATAAAGAACTCGTAAGAAACAAACATTTATATGTGTAAACTTTCTGCATGGAGACAACCTCA
ATTATAACGAAGCCCGGAAGAGGAACATATATACTGTTTCTATTTCCCTTTGACACGGTCCACACTATATTGCATACTTGT
TACTGCCAAATAAAAACAAGTATGTCCACGTGGTTAAAATAAAAACAAAAGAAAACCTTTCTTTTTGTTCAAGTGATAGAAAGTT
TCTTTACATTAATATAAAAATAATATAAGTGTATTCCAAAAGGTAAAAAAAATAAATAAGTTGTGGAAATTCACCTCGTC
TTAGTAAAAAGCCGACCAATCCGGTAGCCGTTTATAATAGCAAACAATATTCTATTATTGTTGTGACGATAAAAATCAATAC
ACCCACACATGACAACATATATAGCCTAAGTTGATATGCACAATTCATCAAATCAAATCAAACAATTACATTTGCTAACTT
GCTATTCCTTTGATTGAGATTTTATTCTAGGAAATAAAATTTTGACACTCATTTTTTTAAAGTTAATTTCTACATTTAGAGAG
AAATATTTTCCAAATCAAATTTTGATCA
```

>*NbPT5b promoter (1068 bp)*

```
GTGAGAAATTTACCAATACCTATAAATAATGTATCAGCCGTATATAAATAACGTATAAGAGATGTTTATACACTATTATATA
TTACTTATATAATGTTATACATTATTATACACTATTATACAAATGAATCATATCAATGGAGCTTCACTGATTCTTCTTCTTCT
TTGGGCATCTTCTGAAATTCAACTCAAATCTACCTCAAATCTGCTCCAAATTAATTTAAATTTGAGTTTTGAACTTCTCTTGA
CGATCCCAATCAATTTGGGCCAACACCTAATCCAAACAACATAACAAAATCGAAAAATCTAATTTTAAATTTGAAGCTTCAAATG
ACCTTTAATGGTGACTCCAAAAATAATAATTCTCTTACGTGGTATTTTTTCTTCTCATCTTAATAGTGATTATCAATTTTGAA
TATGGAAGGAGAATTAATAAATAATATAAATGGTAGGGAACTTTGGGGTGCAAAGTCGTGAAAGAAGAGGAAGAAGAAGAAC
GAAGAAAAGAAAAAATAGGGTGGGCTAACTGGTGAAATTTTTTCCAAATTAATATAAACCCTAGGCTATATCATGTAAGAAC
TTCAAATGTGGCCATTTTTGATGGATTGTTGGACCAATGACAAGGAGCGTAATTCCTTCTTATTTATATGGCACACTA
GGATATTATGAGTTTTAATAAATAAAGAATTTTTTTATGATTTTAAACATGTCGTGACTATAAAAATTTGTGTTATTAAGTAAA
CTAAGAAGTTTGAAGTTAGATTATATCAATTATATAGATTTGTTTTTTTTTTGACACCAACTAACAAAGAAAAAGTTGTCATAT
AAAGCATAAGCATGCGCGCTTTTTGTCCTAGGTTATTTTTGATTGAAGCATATGCTTGATTTAAGCAAAGAAGAAGGATATCC
TGTGGTACTTATCCTCAATTTCTTGTGTAGCCACTGAGCGCTTAGGATTAACGTCATTTAATTCACATTTGTGCGCTGAGT
CTATATATGGGAGTTACATACACCAAAACAGTACCATGAAAACACAACCAAAATTTGCAGTAAAAAGCAAAC
```

>NbBCP1b promoter (1231 bp)

ACTGGTATTAGAATAATAGCCTGTTTAGCCAAAAATTGAAGTGTGGTTTGGGAAGGAAAAAAGTATTTTGAGGAGAGGC  
AGAAGCAGAAAAAGTAGCTTCTCTCCAAAAGTACTTTTTGAGAAGCATTTTTGAGAAAAATACACTTAGAAGCAGTTTTTT  
AAAGCTTGCCCAATCACTAATTGCTGCTCAGAAGTGTTCAAACTAATTAGCCAAACACAACTACTTCTCATCAAAGTA  
CTTTGAAAAAACACTTATTAAAGTAAGCTAATTTTTGCAGCTGGCTAAATGGATTATAAATCACGTATCTGTAAACTAC  
AAATTATATTTTATTGTTCCCTCACATTTTCGAGGTAAACATAAATATAAGTAAAAATATAATGGTAATGTACTCCACTTGCTG  
AATAACTTAGTGTTCATAGCAAGCATATGCTCCACAAATTAAGAGTATGGAGCCATAATATTTCCAATATGAGTGACCCTAT  
AGTTACAATAACAACAACAATCCAGTATAATCTCACATAGTGGGGTCTGGTGAGGGTAGTATGTACGTAGACCTTATCTCTAT  
CCTGGGGTAGAGAGGCTGTTTCCAAATAGACTCCCGACATCATTCTCTCCAAGAACTTCTCACCTTGCTCTTGGGAACTCG  
AACTCACAACCTCTATAGTTAAAACATGATAAATTATGGTCATATTTGTATCTCTTTTTTTGCTTTAATTTTGGGTATGATA  
AAATTCCTTATAAATGCTAACAACCTACTCCGTCCTGTCCAAATAGTAATCGTTTTAGCATGCTGAAATTTGTTTCAAATAT  
TTGGCATTTTAGAAAAATAAATATATTTGTTATTTTTTTATTAACCTTACTACTCCAATTAGTCGATTGTTAATAAGATGAG  
ACATTTAAGAGAAAAAACAACGATAAGTTAGACAAATAATCTTATAATTAATATGTCAAAAATCATAAAAGACAAATAATA  
TGGAATAGAGTAAATATCTACCTACAATACTAAGGTTTTCTCTCTTTGAACTTTACGAGAATAATTAGTGGAAATTTTGCC  
AGCCTAACTCATTGGAATTCACGTACTAGAATTCAAATTAATGAATCACACTTCGTTATCCTCGGATCTCGCTAAGCTCTCTT  
GTTAAGTTAAGGTATAAATAGCCATACCAATTTTTCTTTTTTCAACTAACCTTAAAGAAGAATTTTCC
