# Supplementary material for: MycoRed: Betalain pigments enable in vivo real-time visualisation of arbuscular mycorrhizal colonisation
Source: PubMed Central journal article supplement (PMC8312983; doi:10.1371/journal.pbio.3001326), 2021-07-14
Supplement: pbio.3001326.s022.pdf [file pbio.3001326.s022.pdf]

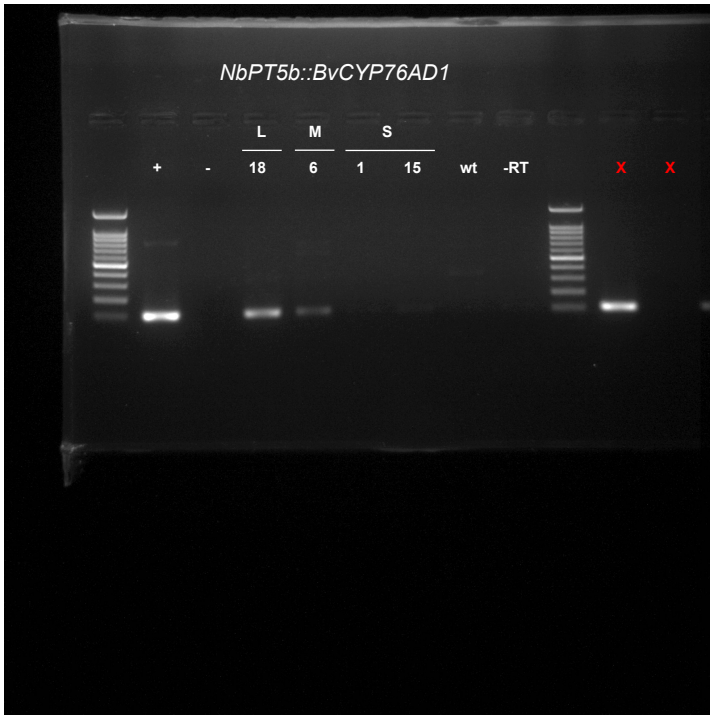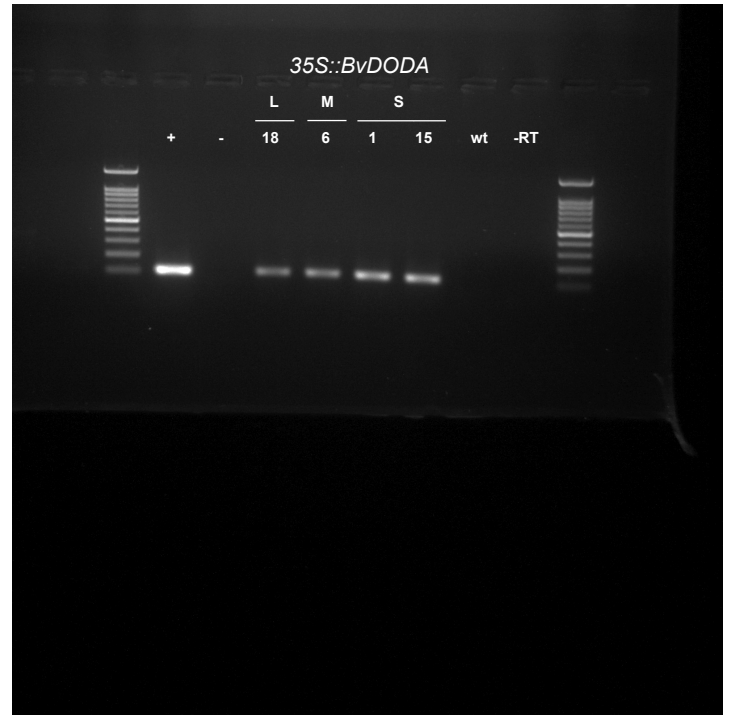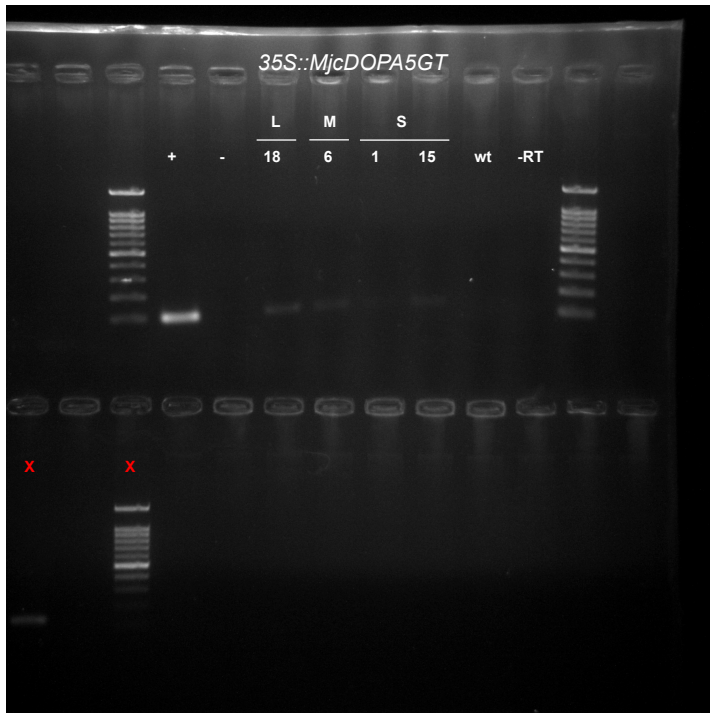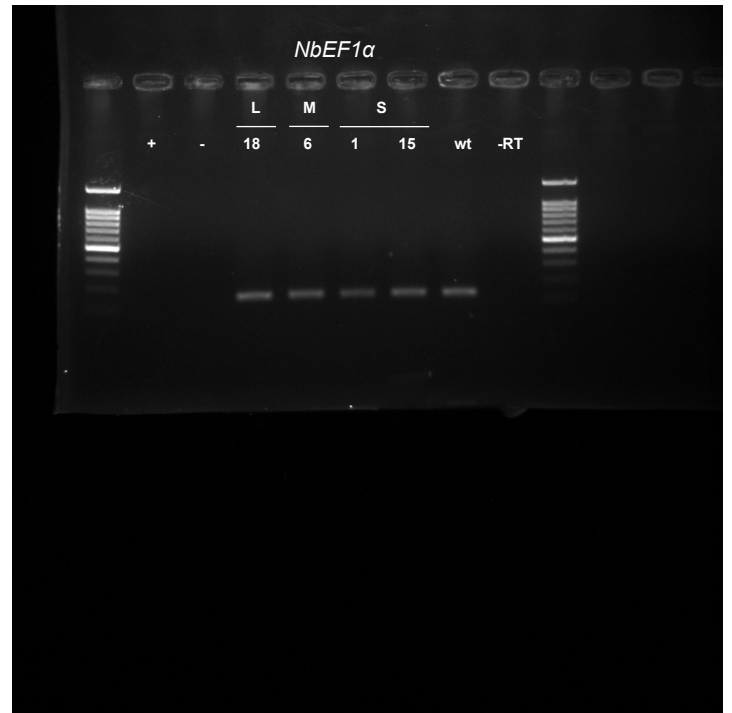

\* GD 100bp DNA Ladder RTU, (ready-to-use), DM001-R500, Newmarket Scientific
